# Supplementary material for: Anatomy of a Flash Flood in a Hyperarid Environment: From Atmospheric Masses to Sediment Dispersal in the Sea
Source: Copernicus journal article supplement (doi:10.5194/egusphere-2024-3354), 2025-02-03
Supplement: Supplementary file [file egusphere-2024-3354-AC1-supplement.pdf]

# Anatomy of a Flash Flood in a Hyperarid Environment: From Atmospheric Masses to Sediment Dispersal in the Sea

*Kalman et al.*

## Supplementary Figures

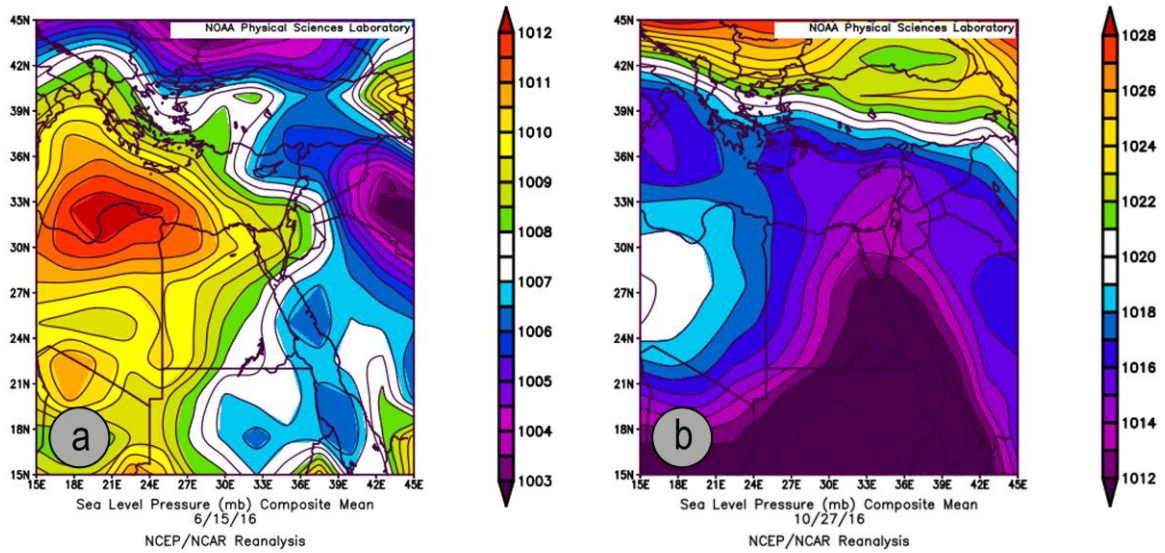

**Supplementary figure 1: Sea-level pressure patterns over the Red Sea in two cases.** (a) A summer scenario without the presence of the Red Sea Trough (RST). (b) A case where the RST is present on the flooding day in Eilat, illustrating its influence on regional pressure distribution.

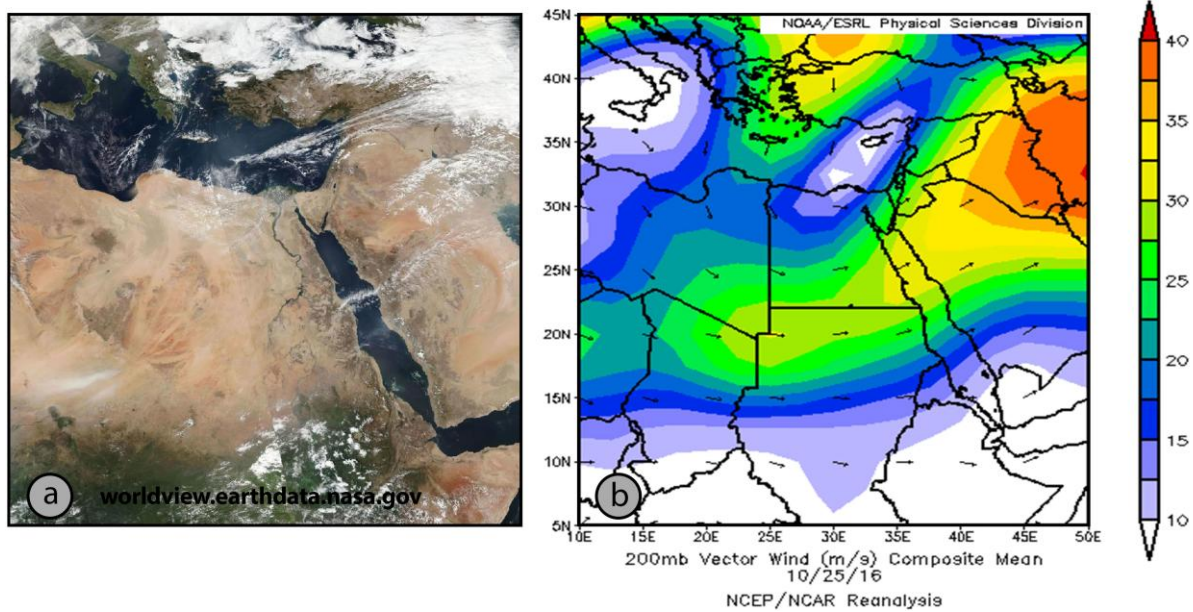

**Supplementary figure 2 Influence of the subtropical jet (STJ) on cloud formation.** (a) Satellite image showing cloud cover over the mid-Red Sea. (b) 200 hPa vector wind composite map indicating that the observed clouds formed due to the intensification of the STJ.

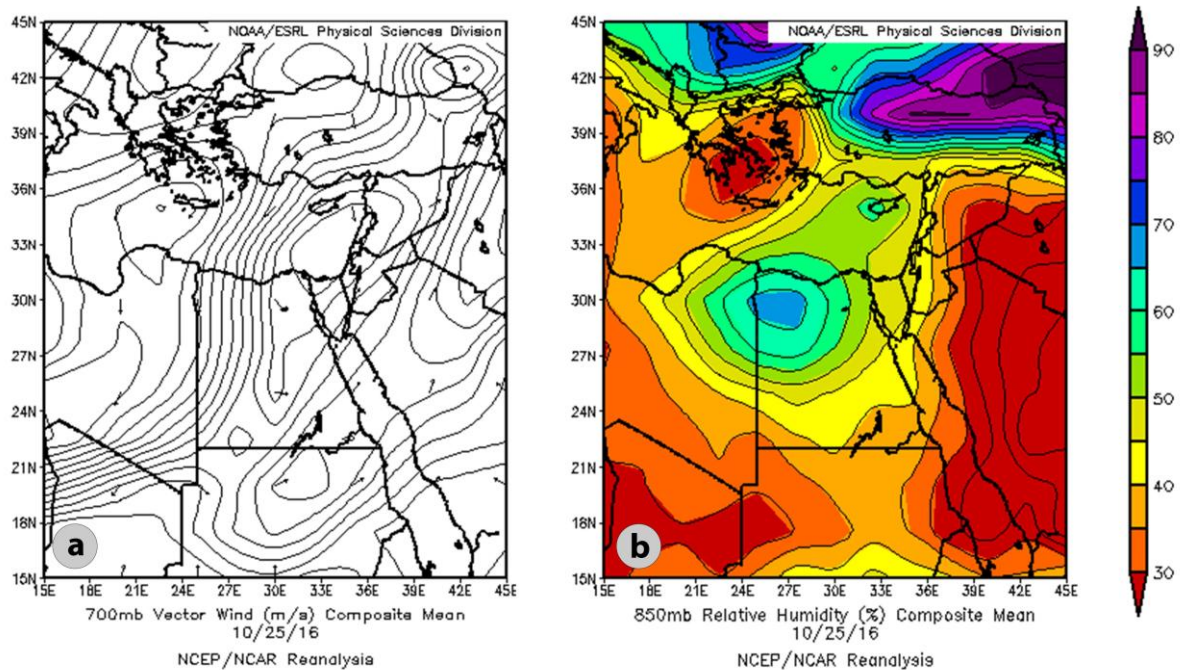

**Supplementary figure 3: Moisture transport towards the Red Sea.** (a) 700 hPa vector wind composite map showing the wind flow patterns. (b) 850 hPa moisture map indicating that moisture was transported at this level from the Libya-Egypt border toward the Red Sea.



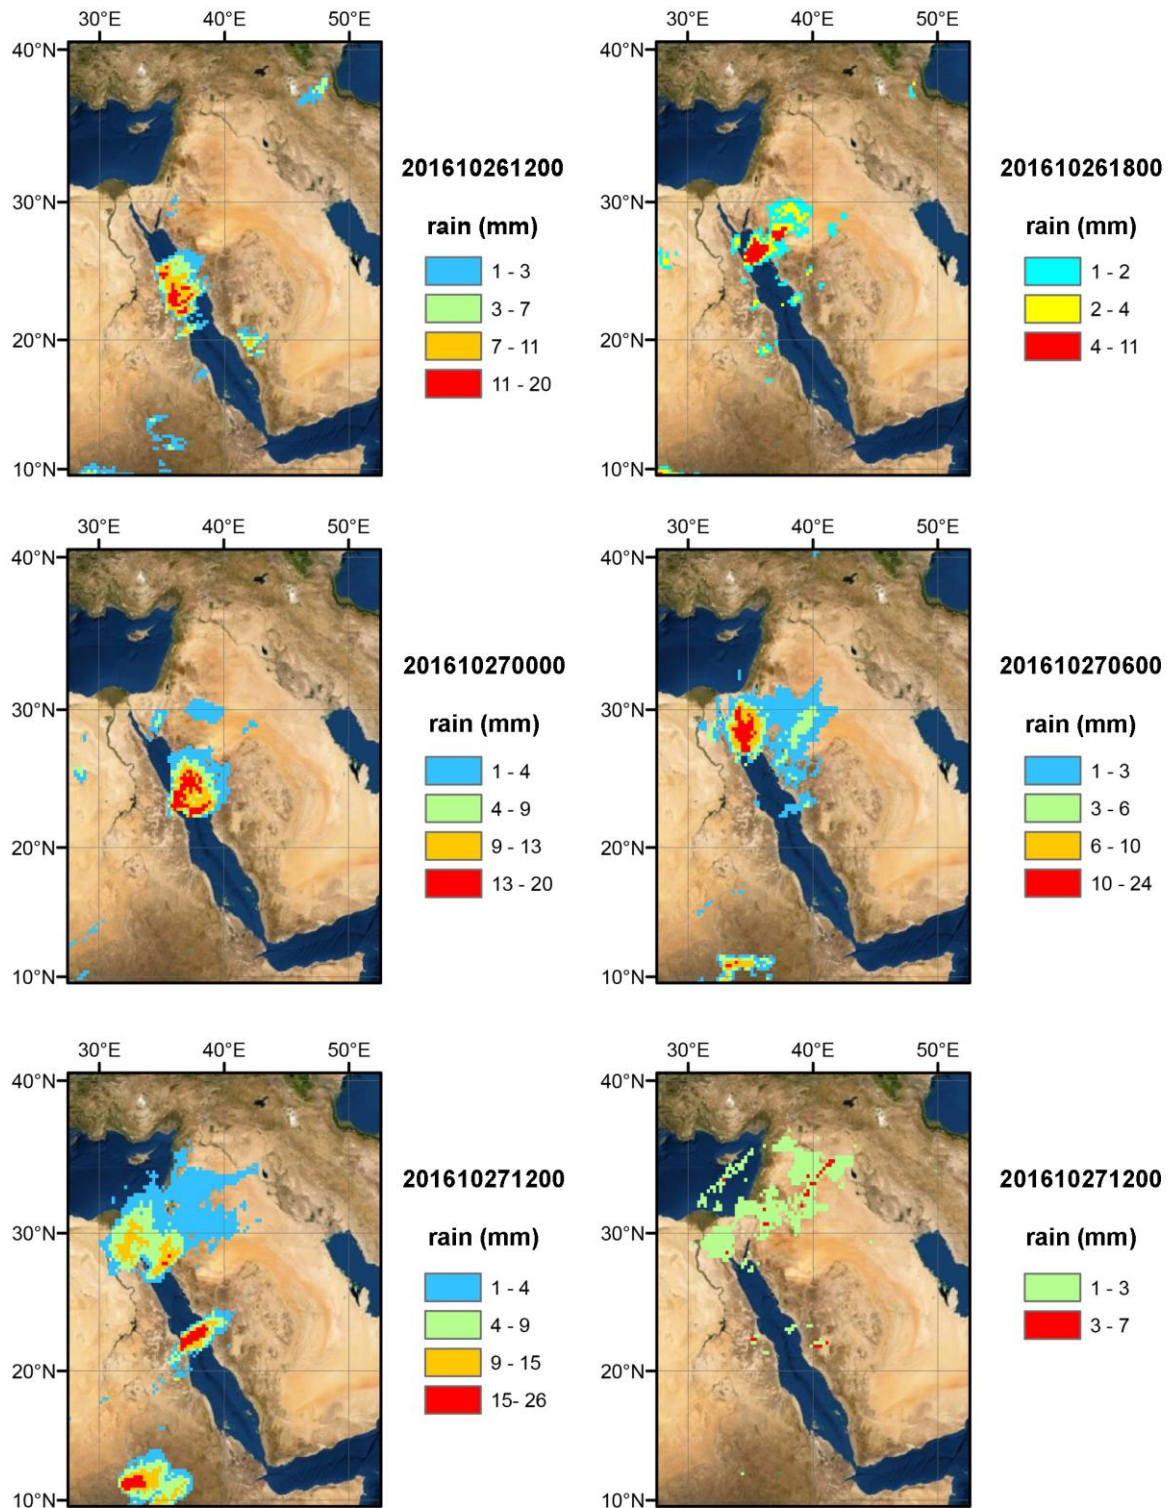

**Supplementary figure 4: Advancement of precipitation centers.** PERSIANN data with a  $0.25^\circ \times 0.25^\circ$  spatial resolution showing the movement of precipitation centers from the mid-Red Sea towards the northern tip of the Gulf of Aqaba-Eilat. Over the course of a day, these precipitation centers advanced approximately 1000 km, reaching Eilat, where the rainstorm triggered a flash flood that eventually drained and transported sediment into the sea.
